# Supplementary material
Source: PubMed Central journal article supplement (PMC3674638)

# Figure S1

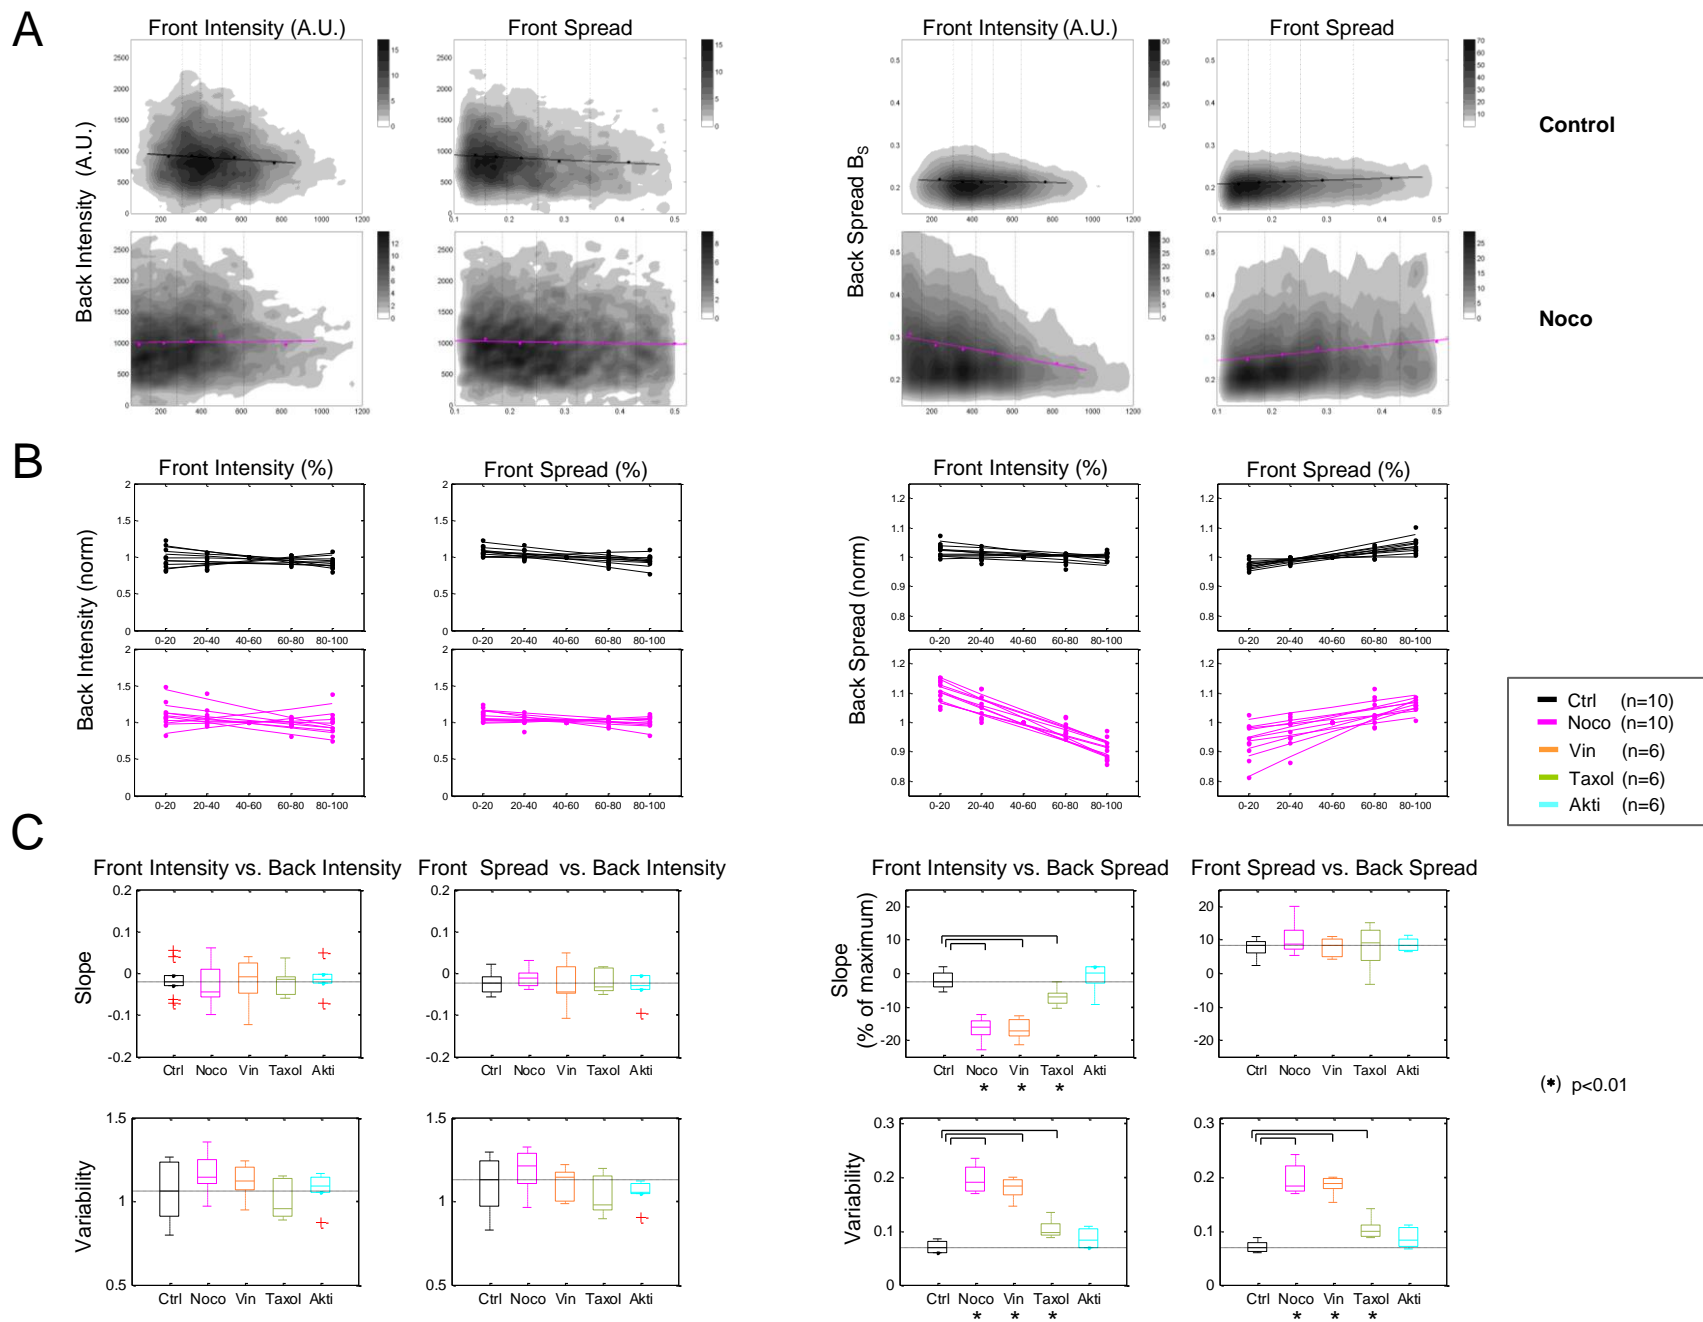

# Figure S2

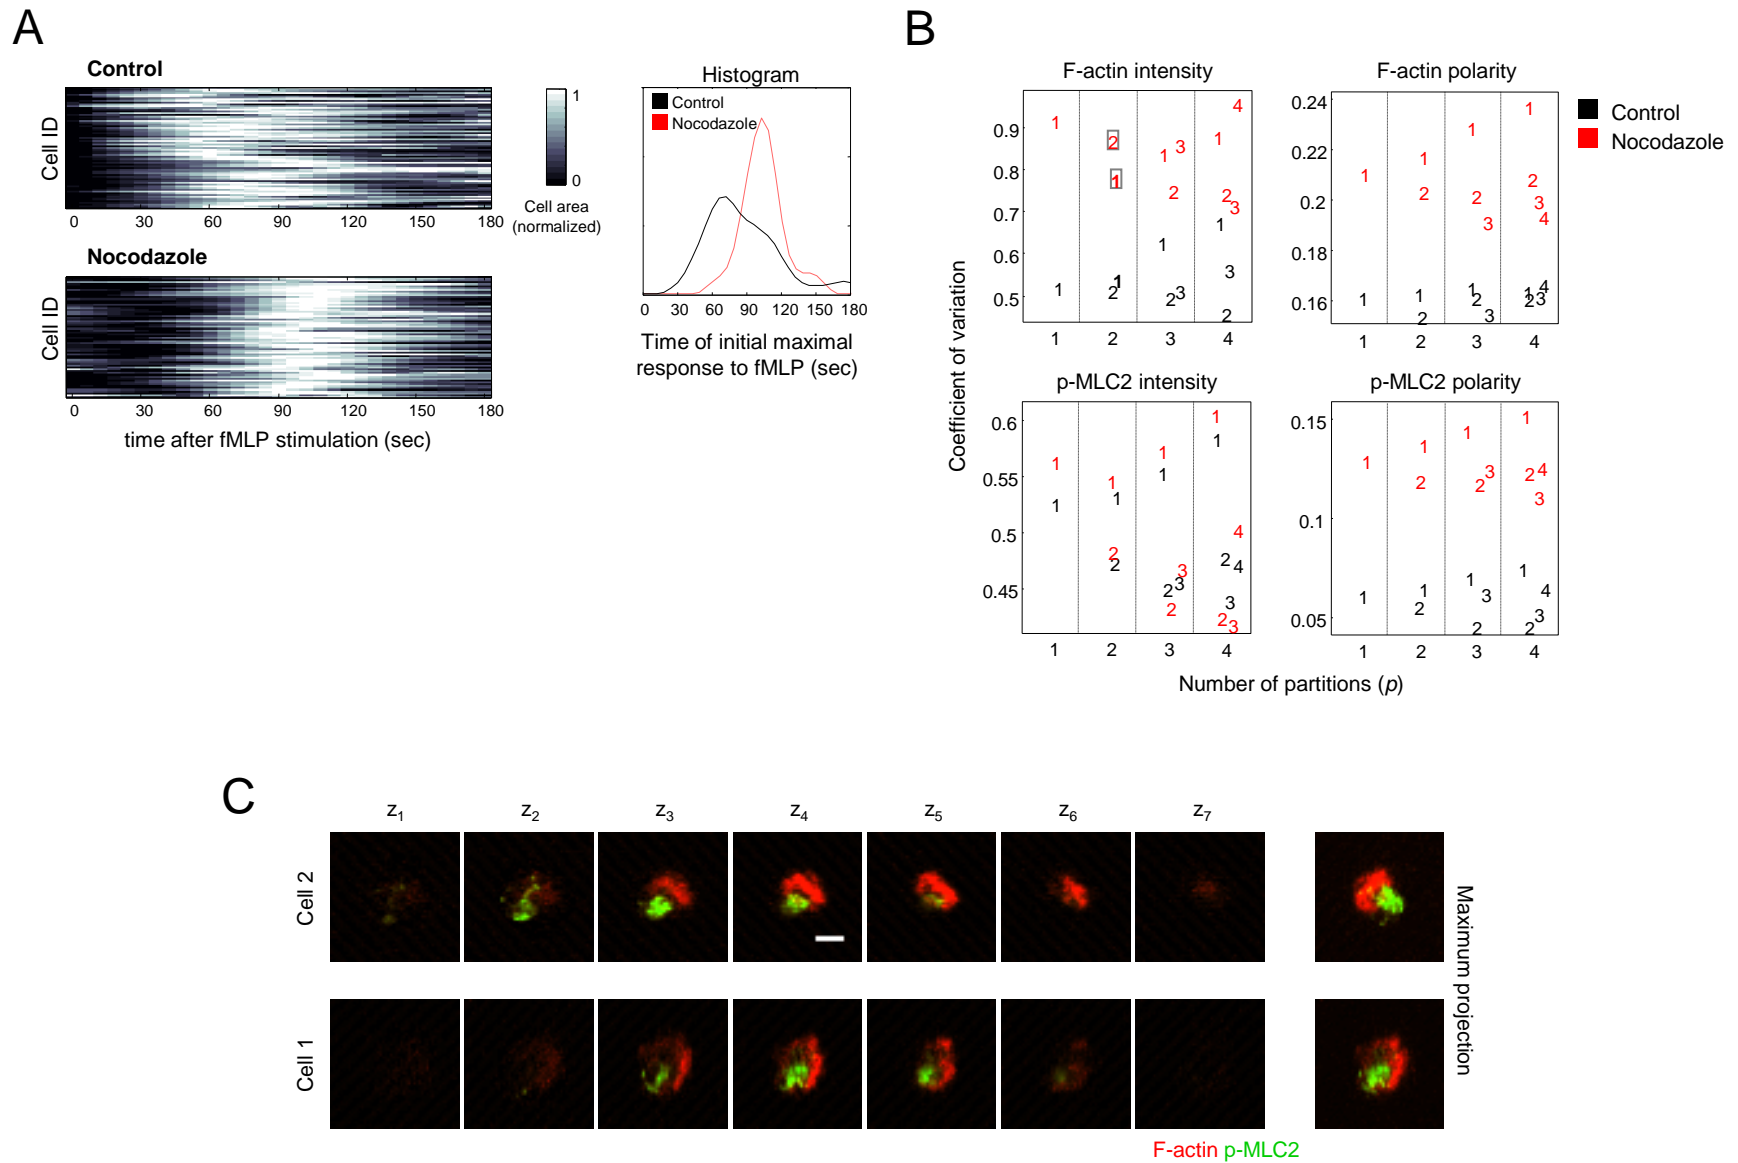

# Figure S3

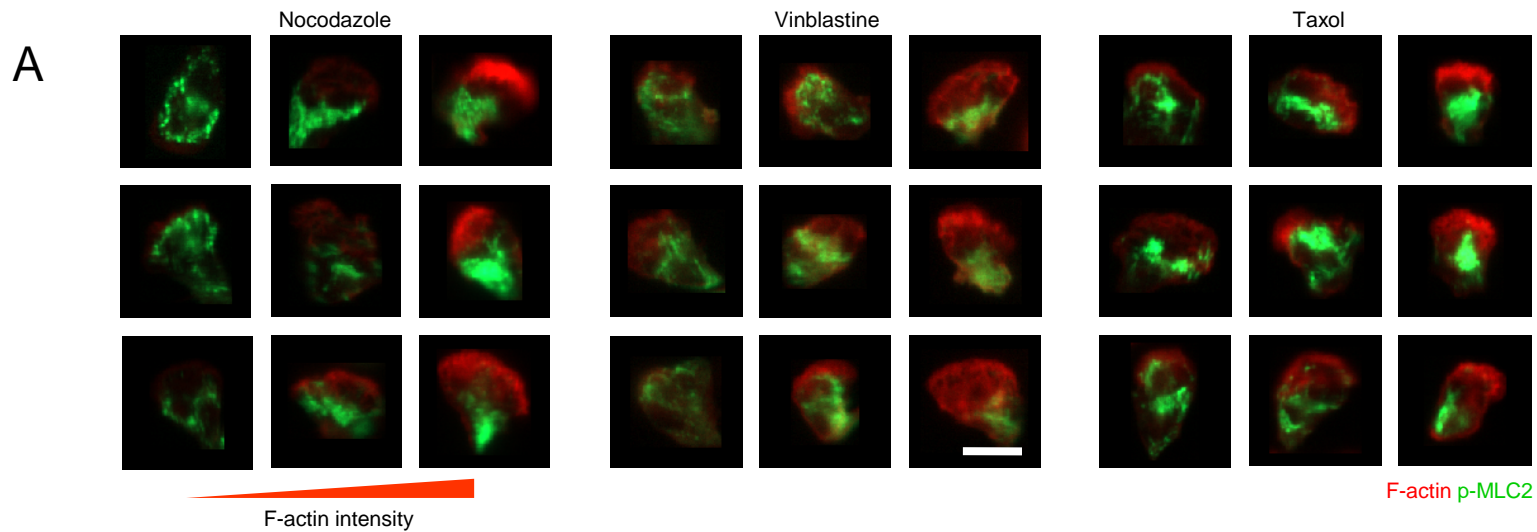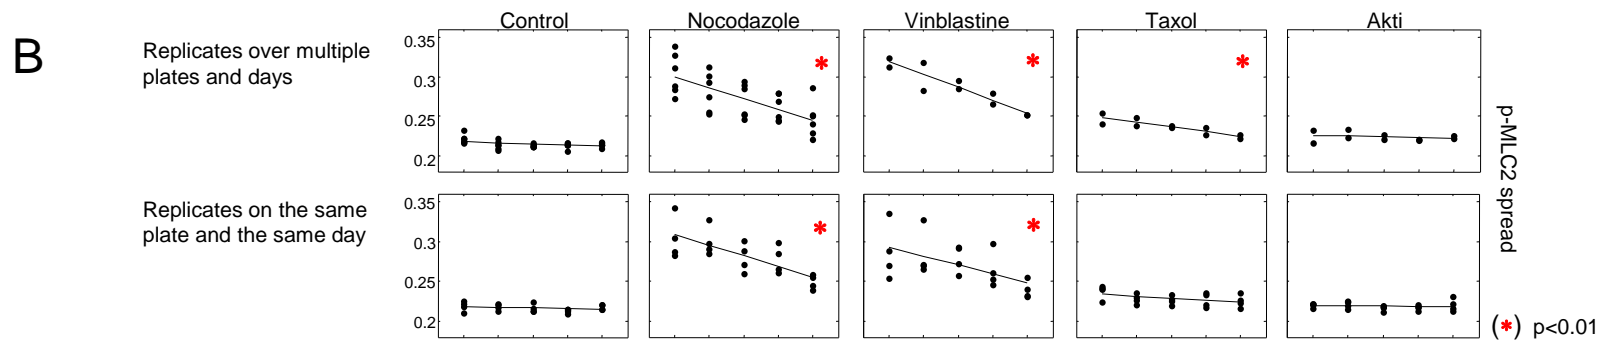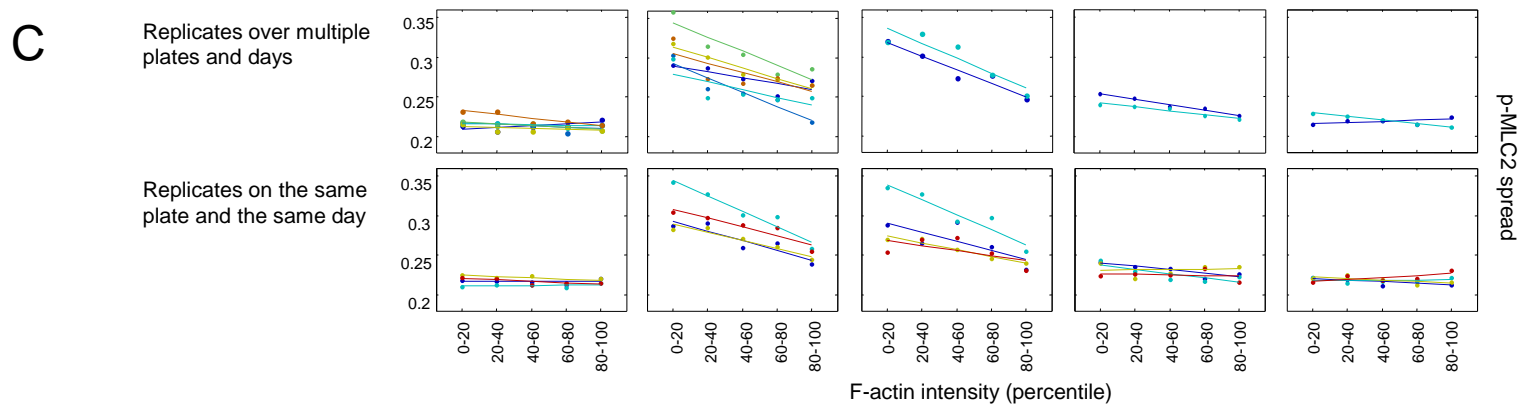

# Figure S4

A

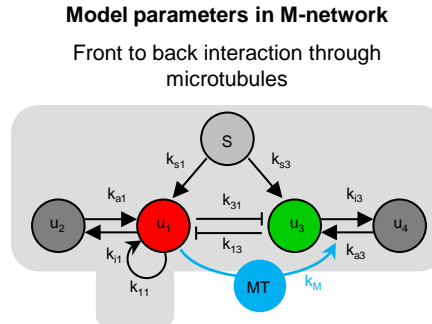

B

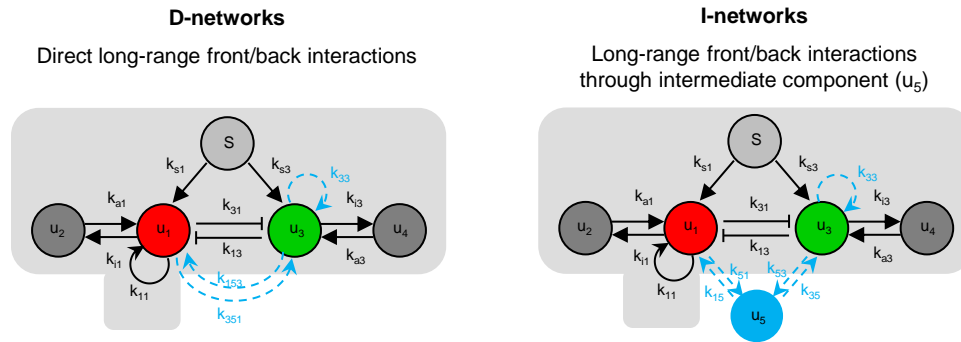

C

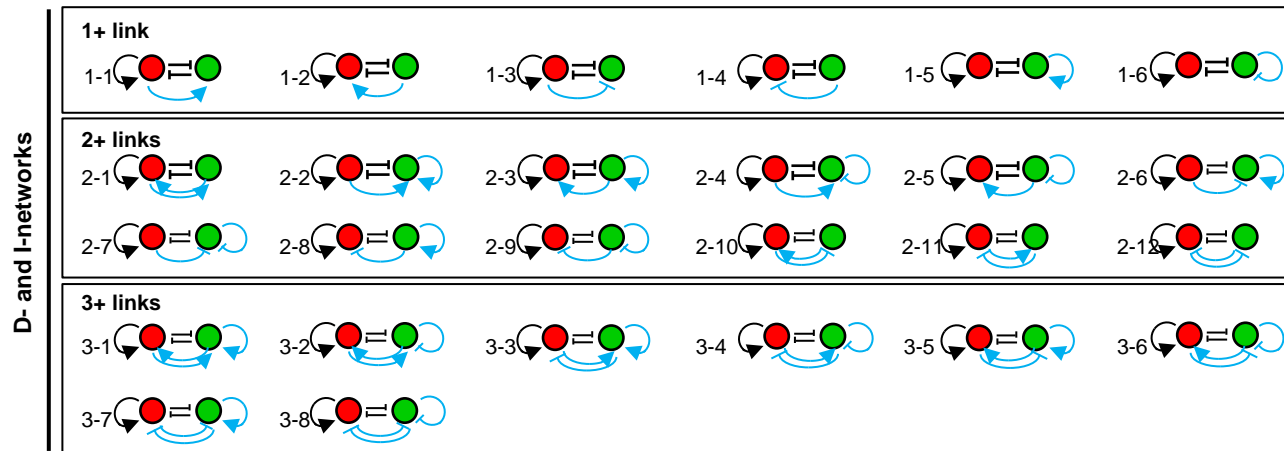

Supplement: NIHMS469524-supplement-03.pdf [file NIHMS469524-supplement-03.pdf]
